# Supplementary material for: Travel time and perinatal mortality after emergency caesarean sections: an evaluation of the 2-hour proximity indicator in Sierra Leone
Source: PubMed Central journal article supplement — BMJ Glob Health. 2020 Dec 21;5(12):e003943. doi: 10.1136/bmjgh-2020-003943 (PMC7754652; doi:10.1136/bmjgh-2020-003943), 2020-12-21
Supplement: bmjgh-2020-003943supp001.pdf [file bmjgh-2020-003943supp001.pdf]

**Figure S1. Facility specific modelled (I and II) travel time, patient locations and study hospitals**

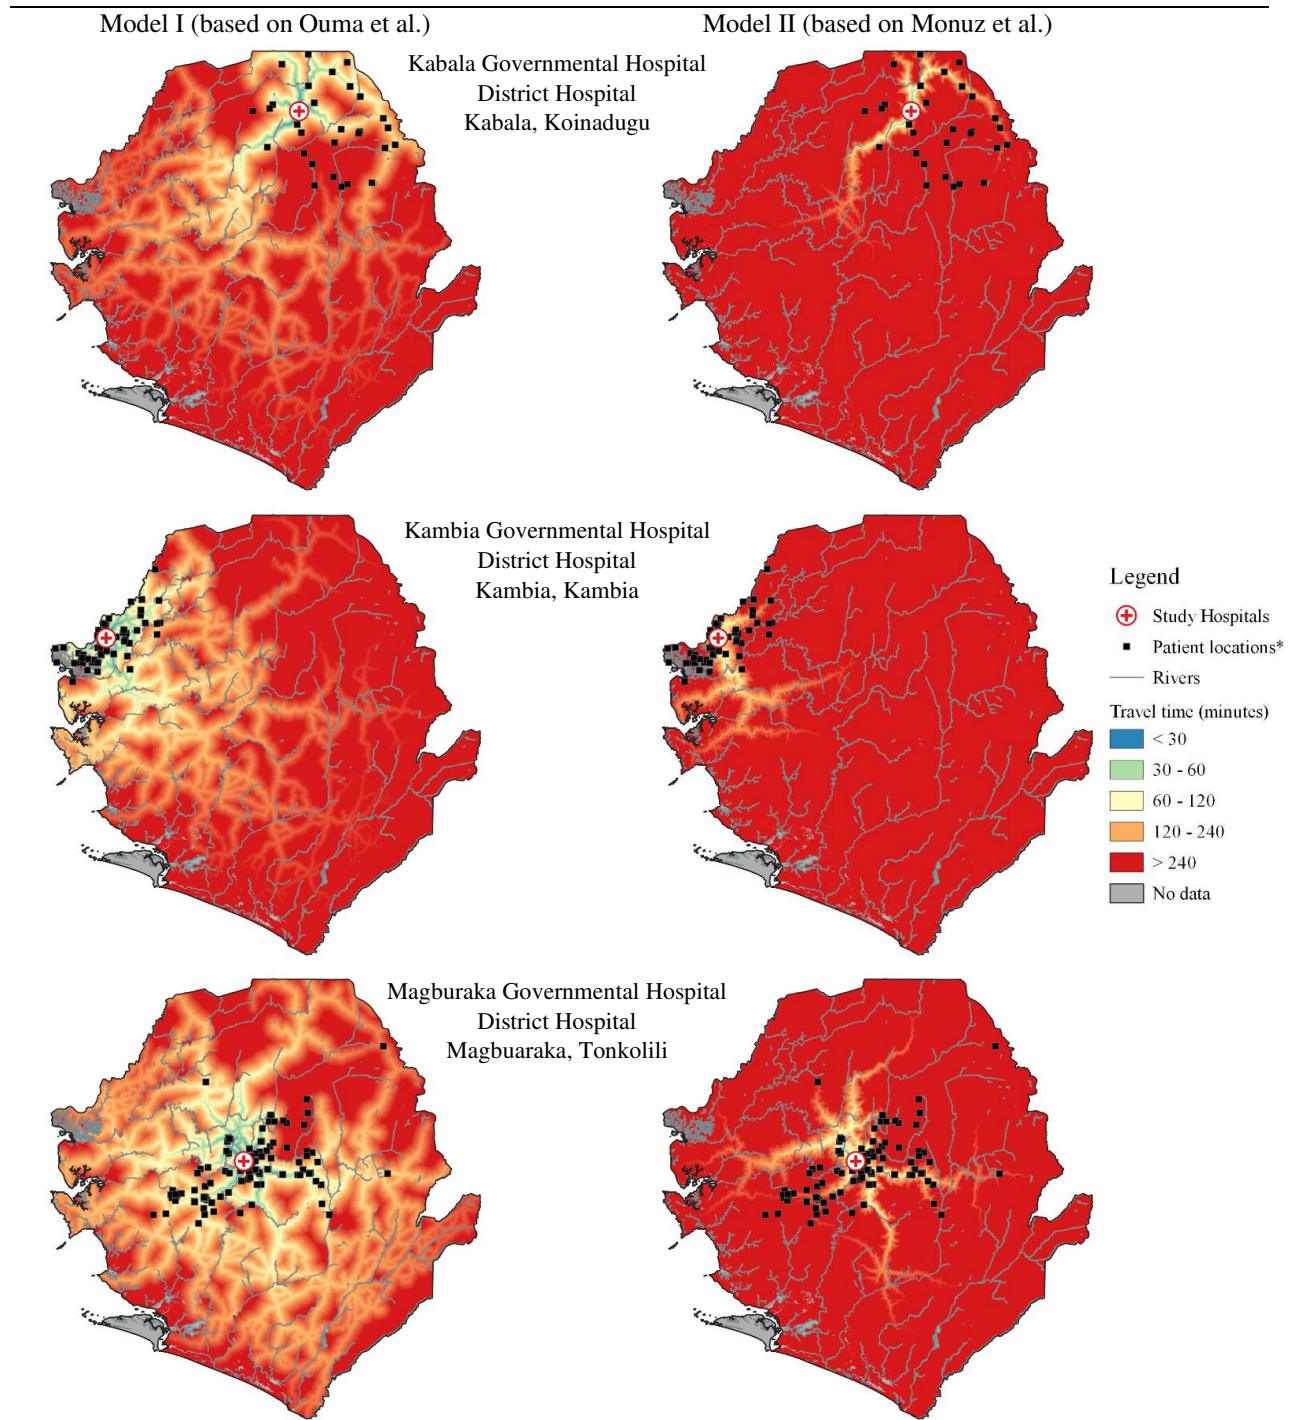

Figure continues on the next page

**Continuation Figure S1.**

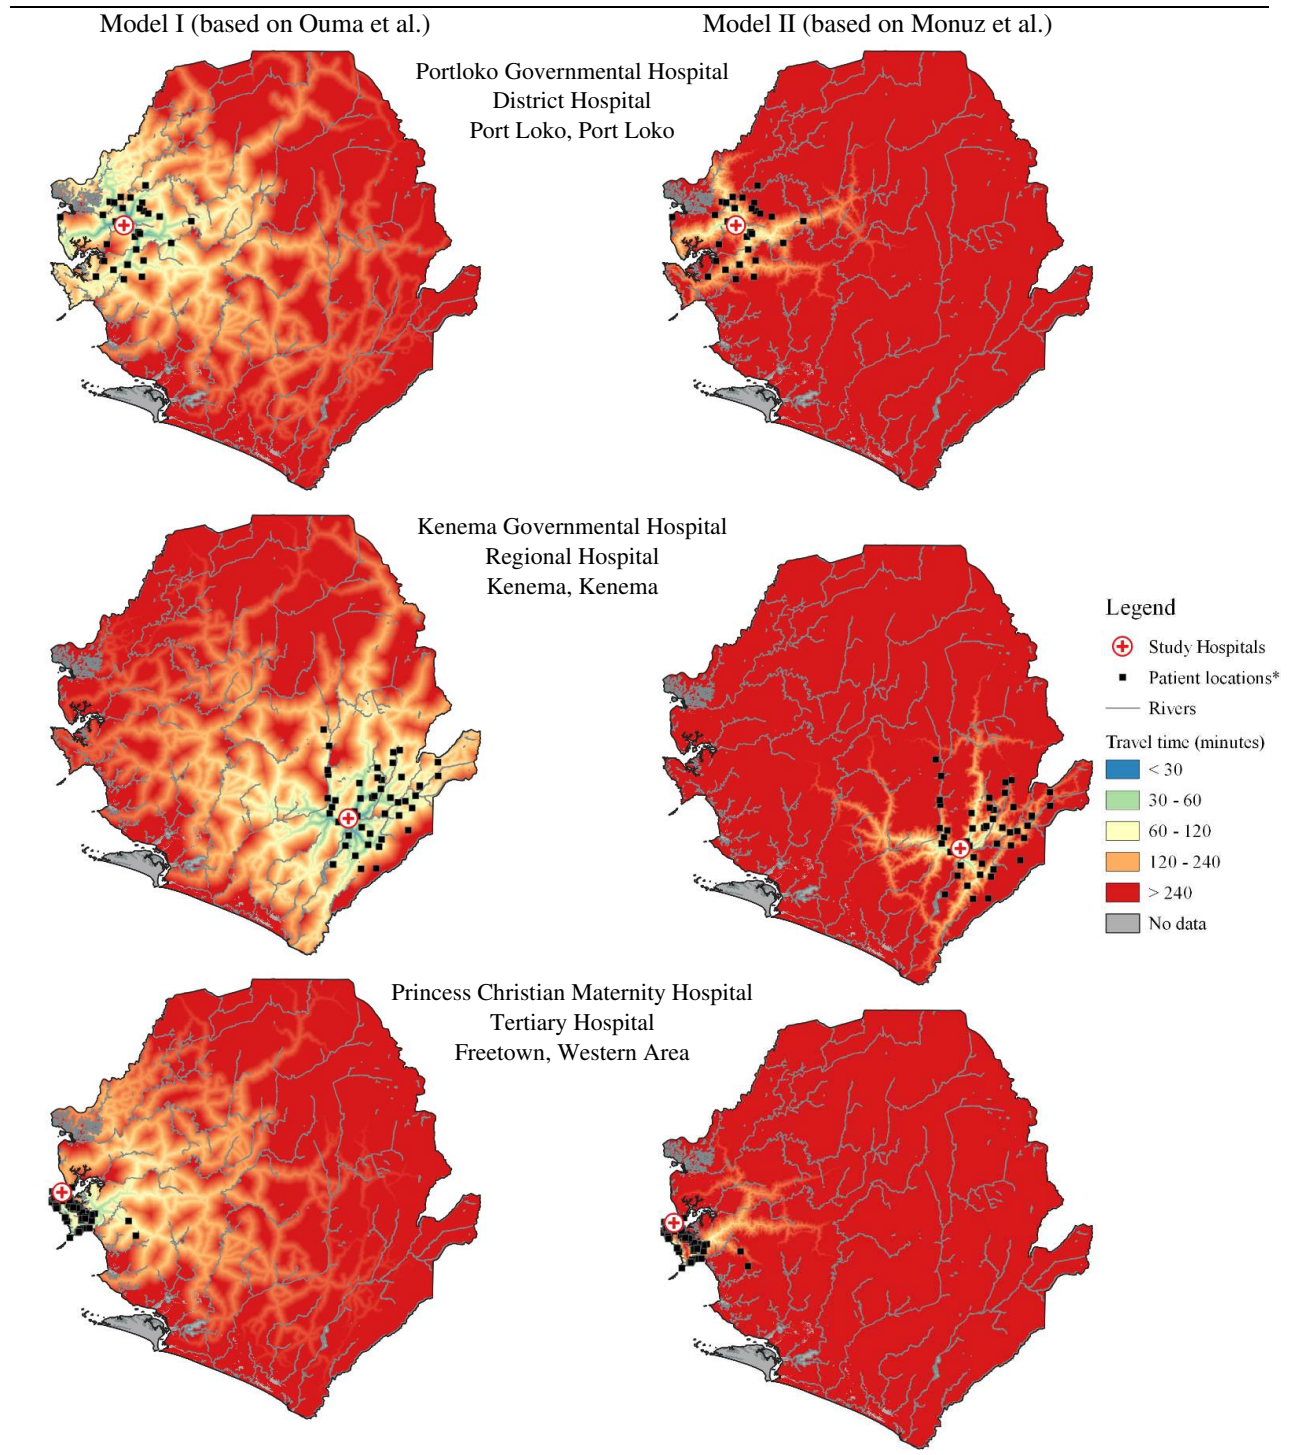

Figure continues on the next page



## Continuation Figure S1.

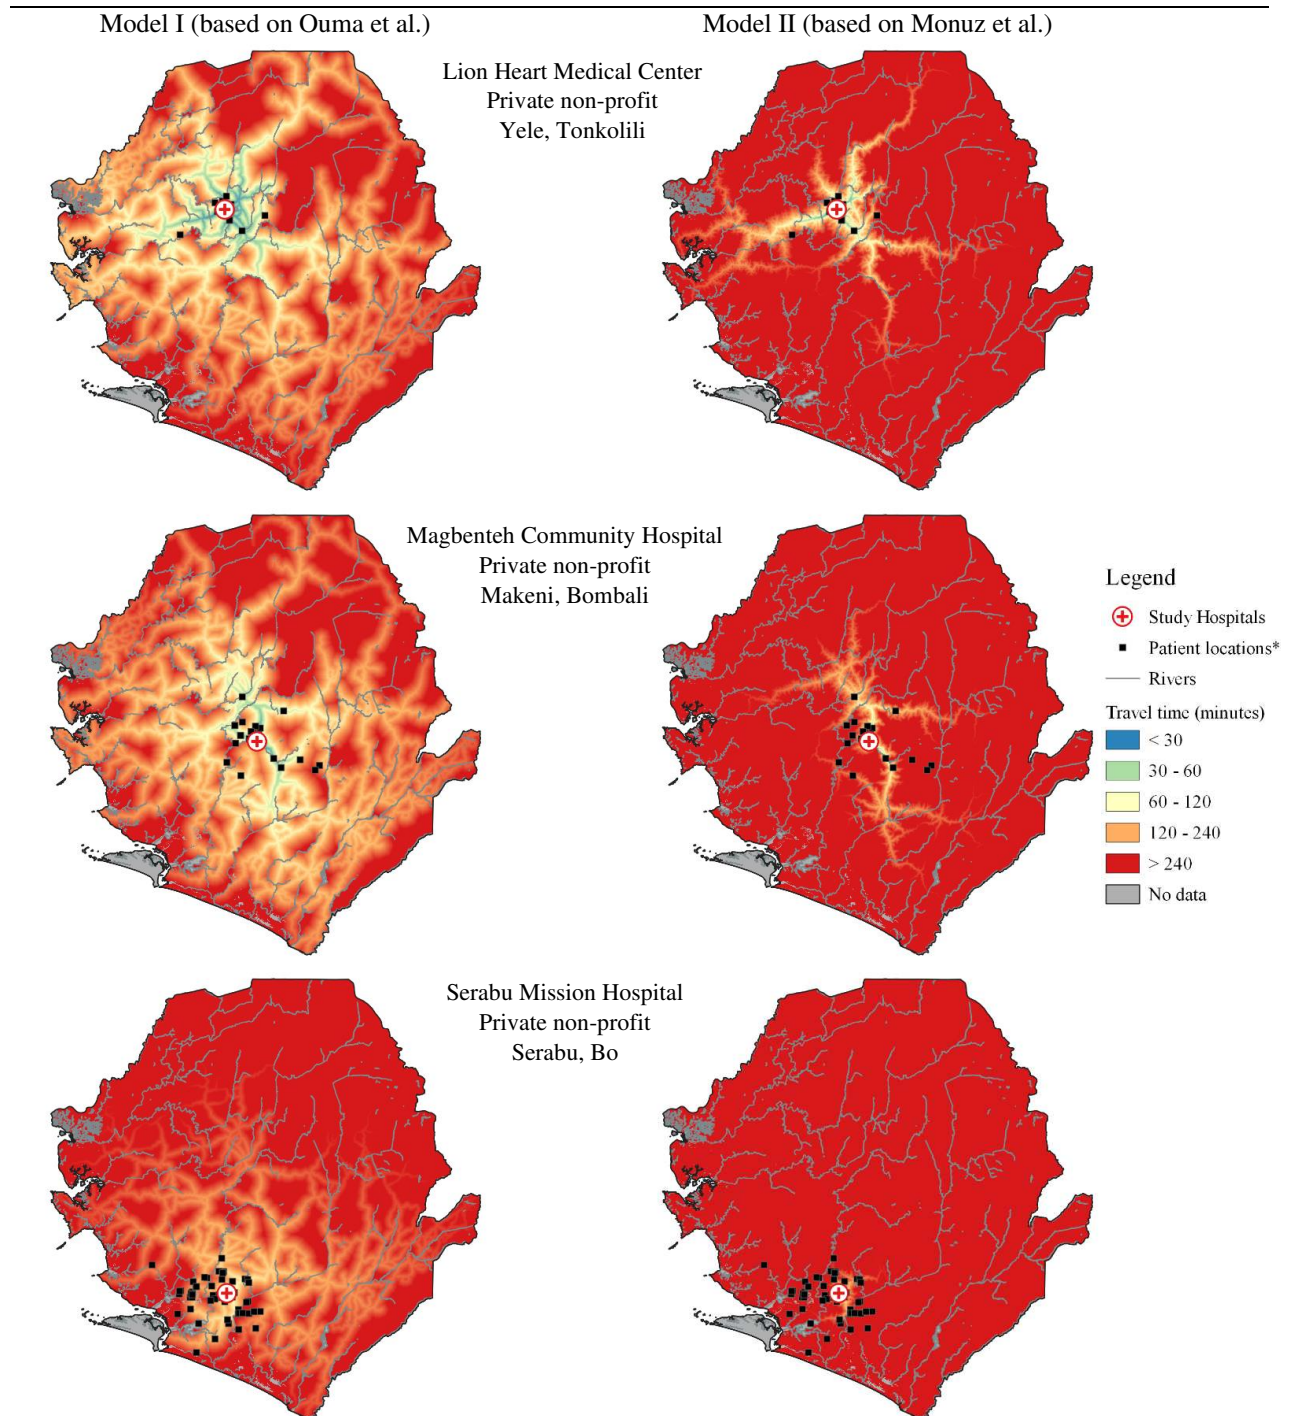

Geospatial modelled travel time (Model I based on Ouma et al.,[11] Model II based on Munoz et al.[12]) for each of the 9 study hospitals. \*Patient locations before traveling to the hospital where the caesarean section was performed.
