# Supplementary material for: Travel time and perinatal mortality after emergency caesarean sections: an evaluation of the 2-hour proximity indicator in Sierra Leone
Source: PubMed Central journal article supplement — BMJ Glob Health. 2020 Dec 21;5(12):e003943. doi: 10.1136/bmjgh-2020-003943 (PMC7754652; doi:10.1136/bmjgh-2020-003943), 2020-12-21
Supplement: bmjgh-2020-003943supp002.pdf [file bmjgh-2020-003943supp002.pdf]

**Figure S2. Confusion matrix for calculating sensitivity, specificity and accuracy for Models I & II**

|                      |                | <b>Model I (Ouma et al.)</b>    |                | Patient-reported travel time |  |
|----------------------|----------------|---------------------------------|----------------|------------------------------|--|
|                      |                |                                 | $\leq 2$ hours | $> 2$ hours                  |  |
| Modelled travel time | $\leq 2$ hours |                                 | 808 (TP)       | 177 (FP)                     |  |
|                      | $> 2$ hours    |                                 | 48 (FN)        | 44 (TN)                      |  |
| Sensitivity: 94%     |                | TP / (TP + FN)                  |                |                              |  |
| Specificity: 20%     |                | FP / (FP + TN)                  |                |                              |  |
| Accuracy: 79%        |                | (TP + TN) / (TP + TN + FP + FN) |                |                              |  |

  

|                      |                | <b>Model II (Munoz et al.)</b> |                | Patient-reported travel time |  |
|----------------------|----------------|--------------------------------|----------------|------------------------------|--|
|                      |                |                                | $\leq 2$ hours | $> 2$ hours                  |  |
| Modelled travel time | $\leq 2$ hours |                                | 703            | 69                           |  |
|                      | $> 2$ hours    |                                | 154            | 153                          |  |
| Sensitivity: 82%     |                |                                |                |                              |  |
| Specificity: 69%     |                |                                |                |                              |  |
| Accuracy: 79%        |                |                                |                |                              |  |

Patient-reported travel time was the gold standard, Model I (based on Ouma et al.[11]) and Model II (based on Munoz et al.[12]) were the test. The test determined whether a patient lived  $\leq 2$  hours from the hospital where the caesarean section was performed. FN = false negatives, FP = false positives, TN = true negatives, TP = true positives.
