# Supplementary material for: Travel time and perinatal mortality after emergency caesarean sections: an evaluation of the 2-hour proximity indicator in Sierra Leone
Source: PubMed Central journal article supplement — BMJ Glob Health. 2020 Dec 21;5(12):e003943. doi: 10.1136/bmjgh-2020-003943 (PMC7754652; doi:10.1136/bmjgh-2020-003943), 2020-12-21

**Figure S3. Patient locations before caesarean section, related hospitals and district boundaries**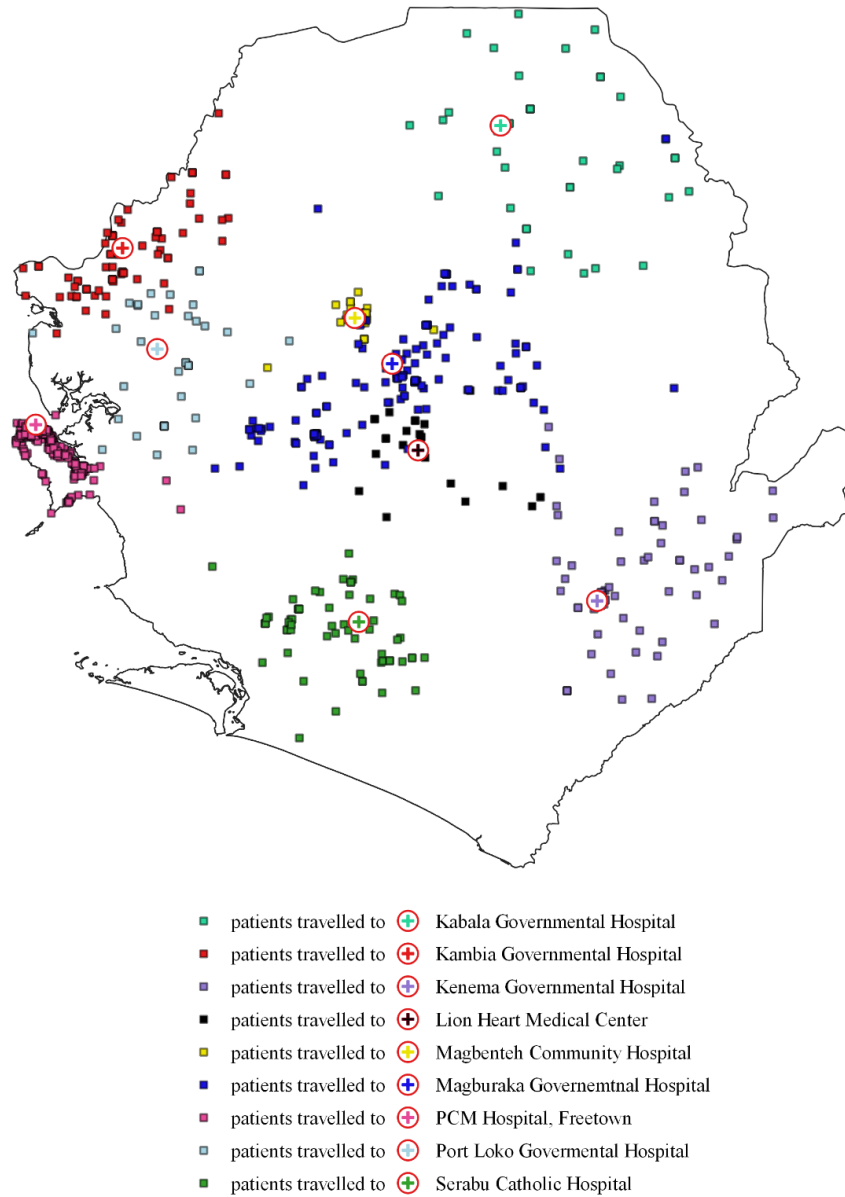

Supplement: bmjgh-2020-003943supp003.pdf [file bmjgh-2020-003943supp003.pdf]
